# Supplementary material
Source: publisher figshare collection journal article supplement (https://acs.figshare.com/ndownloader/files/4603570)
Supplement: Supplementary file 1 [file 4603570]

## Supporting Information for

### Iridoid Glycoside Constituents of *Stachys lanata*

Toshihiro Murata,<sup>\*, †</sup> Yuka Endo,<sup>†</sup> Toshio Miyase,<sup>‡</sup> and  
Fumihiko Yoshizaki<sup>†</sup>

*Department of Pharmacognosy, Tohoku Pharmaceutical University, 4-1 Komatsushima 4-chome Aoba-ku, Sendai 981-8558, Japan and School of Pharmaceutical Sciences, University of Shizuoka, 52-1, Yada, Suruga-ku, Shizuoka 422-8526, Japan*

### Table of Contents

|                                                           |      |
|-----------------------------------------------------------|------|
| Table S2. NMR Spectroscopic Data for Compounds <b>1-4</b> | ···2 |
|-----------------------------------------------------------|------|
